# Supplementary material for: Trigger vs. Substrate: Multi-Dimensional Modulation of QT-Prolongation Associated Arrhythmic Dynamics by a hERG Channel Activator
Source: PubMed Central journal article supplement (PMC5632683; doi:10.3389/fphys.2017.00757), 2017-10-04
Supplement: DataSheet1.pdf [file DataSheet1.pdf]

## ONLINE SUPPLEMENT

# **Trigger versus substrate: multi-dimensional modulation of QT-prolongation associated arrhythmic dynamics by a hERG channel activator**

Michael A. Colman<sup>1\*</sup>, Erick A. Perez Alday<sup>2</sup>, Arun V. Holden<sup>1</sup>, Alan P. Benson<sup>1</sup>

<sup>1</sup>School of Biomedical Sciences & Multidisciplinary Cardiovascular Research Centre, University of Leeds, Leeds, UK

<sup>2</sup>Division of Cardiovascular Medicine, Oregon Health and Science University, Portland, Oregon, USA

Correspondence:

Michael A. Colman

m.a.colman@leeds.ac.uk

## Contents

|                                                                                  |    |
|----------------------------------------------------------------------------------|----|
| Spatial $\text{Ca}^{2+}$ cycling model .....                                     | 3  |
| Variables .....                                                                  | 3  |
| Fundamental equations for $\text{Ca}^{2+}$ concentration .....                   | 4  |
| Reaction terms .....                                                             | 5  |
| Intracellular $\text{Ca}^{2+}$ release, $J_{\text{rel}}$ .....                   | 5  |
| L-type $\text{Ca}^{2+}$ channel flux, $J_{\text{CaL}}$ .....                     | 6  |
| Intracellular uptake and leak, $J_{\text{up}}$ and $J_{\text{leak}}$ .....       | 9  |
| Membrane fluxes, $J_{\text{NaCa}}$ , $J_{\text{pCa}}$ and $J_{\text{CaB}}$ ..... | 9  |
| $\text{Ca}^{2+}$ Buffering .....                                                 | 10 |
| Instantaneous buffering in the cytoplasm .....                                   | 10 |
| Instantaneous buffering in the jSR .....                                         | 10 |
| References .....                                                                 | 11 |

## Spatial Ca<sup>2+</sup> cycling model

This section describes the spatial Ca<sup>2+</sup> cycling model which has been integrated with the ventricular AP model. This model is a simplified and efficient version of a previously developed model [1].

### Variables

**Table S1: Ca<sup>2+</sup> handling model variables**

| Parameter               | Description                                                                | Unit                        |
|-------------------------|----------------------------------------------------------------------------|-----------------------------|
| $[Ca^{2+}]_{ds}$        | Average Ca <sup>2+</sup> concentration in the dyadic cleft                 | μM                          |
| $^m[Ca^{2+}]_{ds}$      | Ca <sup>2+</sup> concentration in dyad in CRU $m$                          | μM                          |
| $[Ca^{2+}]_{rbSS}$      | Average Ca <sup>2+</sup> concentration in the subspace                     | μM                          |
| $^m[Ca^{2+}]_{rbSS}$    | Ca <sup>2+</sup> concentration in subspace in CRU $m$                      | μM                          |
| $[Ca^{2+}]_{cyto}$      | Average Ca <sup>2+</sup> concentration in the bulk cytoplasm               | μM                          |
| $^m[Ca^{2+}]_{cyto}$    | Ca <sup>2+</sup> concentration in cytoplasm in CRU $m$                     | μM                          |
| $[Ca^{2+}]_{nSR}$       | Average Ca <sup>2+</sup> concentration in the network SR                   | μM                          |
| $^m[Ca^{2+}]_{nSR}$     | Ca <sup>2+</sup> concentration in network SR in CRU $m$                    | μM                          |
| $[Ca^{2+}]_{jSR}$       | Average Ca <sup>2+</sup> concentration in the junctional SR                | μM                          |
| $^m[Ca^{2+}]_{jSR}$     | Ca <sup>2+</sup> concentration in junctional SR in CRU $m$                 | μM                          |
| $^mJ_{rel}   J_{rel}$   | Release flux in dyad $m$   Whole cell average release flux                 | μM.ms <sup>-1</sup>         |
| $^mJ_{CaL}   I_{CaL}$   | LTCC flux in dyad $m$   Whole cell current                                 | μM.ms <sup>-1</sup>   pA/pF |
| $^mJ_{up}   J_{up}$     | SR Uptake flux in CRU $m$   Whole cell SR update flux                      | μM.ms <sup>-1</sup>         |
| $^mJ_{leak}   J_{leak}$ | SR leak flux in CRU $m$   Whole cell SR leak flux                          | μM.ms <sup>-1</sup>         |
| $^mJ_{ds}$              | Flux from dyad $m$ to rbSS voxel at $m$                                    | μM.ms <sup>-1</sup>         |
| $^mJ_{ss}$              | Flux from rbSS to cytoplasm voxel $m$                                      | μM.ms <sup>-1</sup>         |
| $^mJ_{jSR}$             | Flux from network to junctional SR at dyad $m$                             | μM.ms <sup>-1</sup>         |
| $^mJ_{trpn}$            | Trpn buffering flux at CRU $m$                                             | μM.ms <sup>-1</sup>         |
| $^mJ_{NaCa}   I_{NaCa}$ | Sodium-Ca <sup>2+</sup> exchanger flux in CRU $m$   Whole cell current     | μM.ms <sup>-1</sup>   pA/pF |
| $^mJ_{pCa}   I_{pCa}$   | PMCA Ca <sup>2+</sup> pump flux in in CRU $m$   Whole cell current         | μM.ms <sup>-1</sup>   pA/pF |
| $J_{Cab}   I_{Cab}$     | Background Ca <sup>2+</sup> current flux in voxel $p$   Whole cell current | μM.ms <sup>-1</sup>   pA/pF |
| $^m\theta_{cyto}$       | Instantaneous buffering in the cytoplasm in CRU $m$                        | -                           |
| $^m\theta_{jSR}$        | Instantaneous buffering in the junctional SR in CRU $m$                    | -                           |
| $^m n_{o\_ryr}$         | Number of open RyRs in dyad $m$                                            | -                           |
| $^m CA$                 | Number of RyRs in the <u>C</u> losed <u>A</u> ctivated state, dyad $m$     | -                           |
| $^m OA$                 | Number of RyRs in the <u>O</u> pen <u>A</u> ctivated state, dyad $m$       | -                           |
| $^m CI$                 | Number of RyRs in the <u>C</u> losed <u>I</u> nactivated state, dyad $m$   | -                           |
| $^m OI$                 | Number of RyRs in the <u>O</u> pen <u>I</u> nactivated state, dyad $m$     | -                           |
| $csqn$                  | Free calsequestrin concentration                                           | mM                          |
| $^m M$                  | Proportion of csqn in monomer state, dyad $m$                              | -                           |
| $^m d_1$                | LTCC activation gate state 1, dyad $m$                                     | -                           |
| $^m d_2$                | LTCC activation gate state 2, dyad $m$                                     | -                           |
| $^m d_3$                | LTCC activation gate state 3, dyad $m$                                     | -                           |
| $^m f_1$                | LTCC voltage-dependent inactivation state 1, dyad $m$                      | -                           |
| $^m f_2$                | LTCC voltage-dependent inactivation state 2, dyad $m$                      | -                           |
| $^m fca_1$              | LTCC Ca <sup>2+</sup> -dependent inactivation state 1, dyad $m$            | -                           |
| $^m fca_2$              | LTCC Ca <sup>2+</sup> -dependent inactivation state 2, dyad $m$            | -                           |
| $V_m$                   | Membrane potential                                                         | mV                          |

## Fundamental equations for Ca<sup>2+</sup> concentration

$$\frac{d[Ca^{2+}]_i}{dt} = \beta_i \left( \mathbf{D}\nabla^2[Ca^{2+}]_i + \phi_i + (v_{ss}/v_i) J_{ss} \right) \quad (1)$$

$$\frac{d[Ca^{2+}]_{ss}}{dt} = \mathbf{D}\nabla^2[Ca^{2+}]_{ss} + \phi_{ss} - J_{ss} + (v_{ds}/v_{ss}) J_{ds} \quad (2)$$

$$\frac{d[Ca^{2+}]_{nsr}}{dt} = \beta_{nsr} \left( \mathbf{D}\nabla^2[Ca^{2+}]_{nsr} + \phi_{nsr} - (v_{jsr}/v_{nsr}) J_{jsr} \right) \quad (3)$$

$$\frac{d[Ca^{2+}]_{ds}}{dt} = \phi_{ds} - J_{ds} \quad (4)$$

$$\frac{d[Ca^{2+}]_{jsr}}{dt} = \phi_{jsr} + J_{jsr} \quad (5)$$

Where transfer between compartments is given by:

$$J_{ss} = \left( [Ca^{2+}]_{ss} - [Ca^{2+}]_i \right) \tau_{ss}^{-1} \quad (6)$$

$$J_{ds} = \left( [Ca^{2+}]_{ds} - [Ca^{2+}]_{ss} \right) \tau_{ds}^{-1} \quad (7)$$

$$J_{jsr} = \left( [Ca^{2+}]_{jsr} - [Ca^{2+}]_{nsr} \right) \tau_{jsr}^{-1} \quad (8)$$

And the reaction terms are:

$$\phi_i = J_{NaCa} + J_{pCa} + J_{Cab} - (J_{up} - J_{leak}) - J_{trpn} \quad (9)$$

$$\phi_{nsr} = (J_{up} - J_{leak}) (v_i/v_{nsr}) \quad (10)$$

$$\phi_{ss} = J_{NaCa_{ss}} \quad (11)$$

$$\phi_{ds} = J_{rel} + J_{CaL} \quad (12)$$

$$\phi_{jsr} = -J_{rel} (v_{ds}/v_{jsr}) \quad (13)$$

Spatial diffusion is described by a 6-node nearest neighbours finite difference approximation:

$$\mathbf{D}\nabla^2[Ca^{2+}]_x \approx J_{Ca\_diff\_x} = \sum_{i=1}^{i=3} \left( \frac{e_i^{+1}[Ca^{2+}]_x + e_i^{-1}[Ca^{2+}]_x - e_i[Ca^{2+}]_x}{\tau_{x,e_i}} \right) \quad (14)$$

Where  $e_i$  refers to the three dimensions (x,y,z)

**Table S2: Cell structure and diffusion parameters**

| Parameter                 | Description                                       | Value                                |
|---------------------------|---------------------------------------------------|--------------------------------------|
| $V_i$                     | Cytoplasm volume per CRU                          | $1.0 \mu\text{m}^3$                  |
| $V_{nsr}$                 | Network SR volume per CRU                         | $0.05 \mu\text{m}^3$                 |
| $V_{ss}$                  | Sub-space volume per CRU                          | $0.0175 \mu\text{m}^3$               |
| $\langle V_{ds} \rangle$  | Average volume of individual dyad                 | $1.712 \times 10^{-3} \mu\text{m}^3$ |
| $V_{jsr}$                 | Volume individual jSR                             | $0.015 \mu\text{m}^3$                |
| $\tau_{ds}$               | Time constant diffusion from dyad to SS           | $0.022 \text{ ms}$                   |
| $\tau_{ss}$               | Time constant diffusion from SS to cytoplasm      | $0.1 \text{ ms}$                     |
| $\tau_{jsr}$              | Time constant diffusion from nSR to jSR           | $5 \text{ ms}$                       |
| $\tau_{i,transverse}$     | Time constant of transverse cytoplasm diffusion   | $2.3 \text{ ms}$                     |
| $\tau_{i,longitudinal}$   | Time constant of longitudinal cytoplasm diffusion | $2.9 \text{ ms}$                     |
| $\tau_{ss,transverse}$    | Time constant of transverse subspace diffusion    | $1.25 \text{ ms}$                    |
| $\tau_{ss,longitudinal}$  | Time constant of longitudinal subspace diffusion  | $1.95 \text{ ms}$                    |
| $\tau_{nSR,transverse}$   | Time constant of transverse nSR diffusion         | $7 \text{ ms}$                       |
| $\tau_{nSR,longitudinal}$ | Time constant of longitudinal nSR diffusion       | $14 \text{ ms}$                      |

### Reaction terms

The formulations for the reaction terms (Equations (9-13)) are described below:

#### Intracellular $\text{Ca}^{2+}$ release, $J_{rel}$

$${}^m J_{rel} = {}^m k_{rel} \left( {}^m [\text{Ca}^{2+}]_{jsr} - {}^m [\text{Ca}^{2+}]_{ds} \right) \quad (15)$$

$${}^m k_{rel} = {}^m n_{o\_RyR} \cdot g_{RyR} \cdot {}^m V_{ds}^{-1} \quad (16)$$

${}^m n_{o\_RyR}$  is the number of open RyR channels in dyad  $m$ . RyR dynamics is described by a 4-state Markov Chain model. The model is similar to Stern et al [2] and Restrepo et al [3], with a functional monomer induced inactivation based on csqn dynamics described by Gaur-Rudy [4].

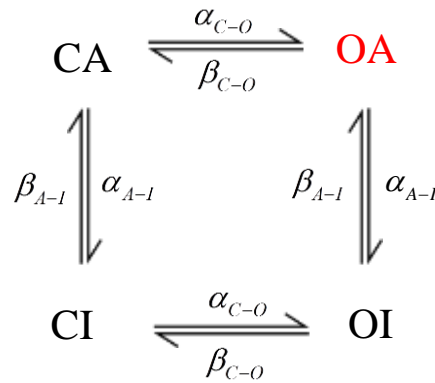

$$\frac{d {}^m \text{CA}}{dt} = {}^m \text{OA} \cdot \beta_{C-O} + {}^m \text{CI} \cdot \beta_{A-I} - {}^m \text{CA} \cdot (\alpha_{C-O} + \alpha_{A-I}) \quad (17)$$

$$\frac{d {}^m \text{OA}}{dt} = {}^m \text{CA} \cdot \alpha_{C-O} + {}^m \text{OI} \cdot \beta_{A-I} - {}^m \text{OA} \cdot (\beta_{C-O} + \alpha_{A-I}) \quad (18)$$

$$\frac{d^m CI}{dt} = {}^m OI \cdot \beta_{C-O} + {}^m C \cdot \alpha_{A-I} - {}^m CI \cdot (\alpha_{C-O} + \beta_{A-I}) \quad (19)$$

$$\frac{d^m OI}{dt} = {}^m CI \cdot \alpha_{C-O} + {}^m OA \cdot \alpha_{A-I} - {}^m OI \cdot (\beta_{C-O} + \beta_{A-I}) \quad (20)$$

Where:

$$\alpha_{C-O} = k_a \left( {}^m [Ca^{2+}]_{ds} \right)^H \quad (21)$$

$$\beta_{C-O} = k_b \quad (22)$$

$$\alpha_{A-I} = (1 - {}^m Mi_{ss}) / \tau_{Mi,1} \quad (23)$$

$$\beta_{A-I} = {}^m Mi_{ss} / \tau_{Mi,2} \quad (24)$$

$${}^m Mi_{ss} = 1 / \left( 1 + e^{({}^m M - 0.5) / 0.04167} \right) \quad (25)$$

$$\frac{dM}{dt} = \alpha_M (1 - M) + \beta_M M \quad (26)$$

$$\alpha_M = M_{ss} / \tau_{M,1} \quad (27)$$

$$\beta_M = (1 - M_{ss}) / \tau_{M,2} \quad (28)$$

$$M_{ss} = 1 / \left( 1 + e^{(-6.5 \cdot (csqn - 6.37))} \right) \quad (29)$$

$$csqn = B_{csqn} \cdot K_{mcsqn} / \left( {}^m [Ca^{2+}]_{jSR} + K_{mcsqn} \right) \quad (30)$$

In this model, *OA* is the only state in which a flux occurs. Thus,  ${}^m n_{o\_RyR}$  is equal to the number of channels in dyad *m* which are in state *OA* (red text in schematic).

### L-type $Ca^{2+}$ channel flux, $J_{CaL}$

The flux through the L-type Calcium Current is defined as:

$${}^m J_{CaL} = -{}^m n_{o\_LTCC} {}^m \bar{J}_{CaL} \quad (31)$$

Where  ${}^m n_{o\_LTCC}$  is the number of open LTCC channels in dyad *m* (defined below) and  $\bar{J}_{CaL}$  is the maximal flux rate per channel [5]:

$${}^m \bar{J}_{CaL} = 4P_{Ca} zF \frac{\frac{1}{2} \gamma_{Ca} {}^m [Ca^{2+}]_{ds} e^{2z} - \gamma_{Ca} [Ca^{2+}]_o}{e^{2z} - 1} \quad (32)$$

$$z = \frac{V_m F}{RT} \quad (33)$$

Where  $[Ca^{2+}]_o$  is the extracellular  $Ca^{2+}$  concentration,  $P_{Ca}$  is the maximum permeability of an individual LTCC and  $F$  is the Faraday constant.

The LTCCs are described by a Markov Chain construction of a Hodgkin-Huxley model [5,6]

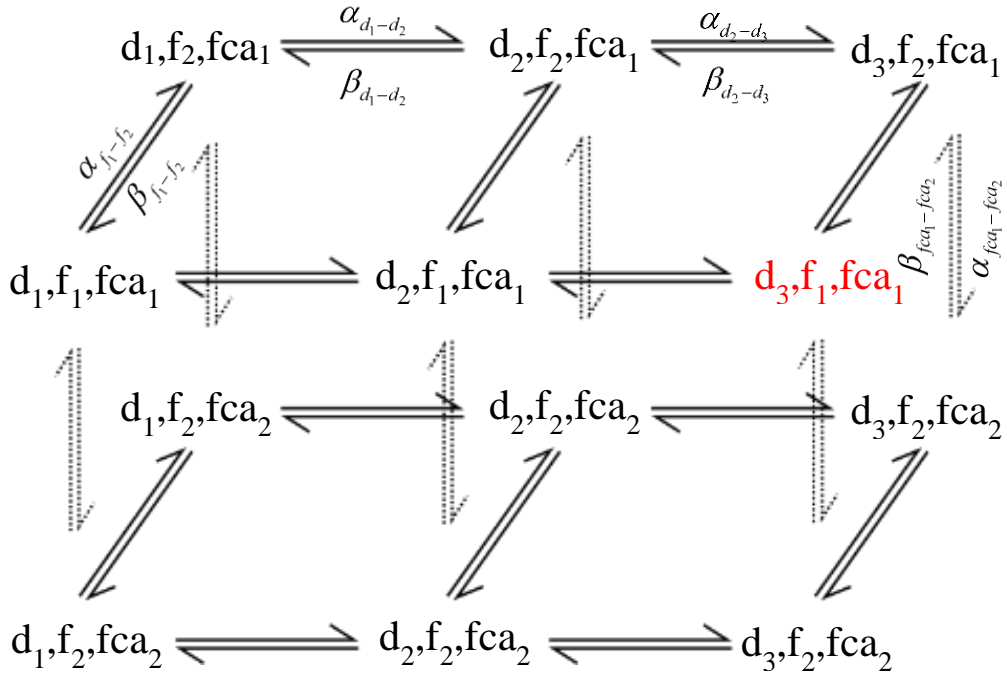

Which is equivalent to the three gate Hodgkin-Huxley model:

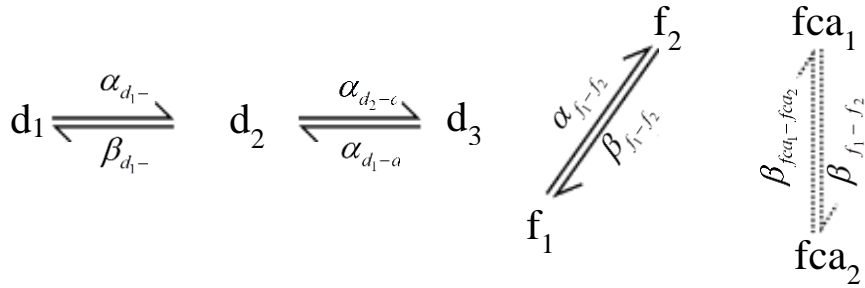

And thus described by:

$$\frac{d(d_1)}{dt} = d_2 \beta_{d_1-d_2} - d_1 \alpha_{d_1-d_2} \quad (34)$$

$$\frac{d(d_2)}{dt} = d_1 \alpha_{d_1-d_2} + d_3 \beta_{d_2-d_3} - d_2 (\beta_{d_1-d_2} + \alpha_{d_2-d_3}) \quad (35)$$

$$\frac{d(d_3)}{dt} = d_2 \alpha_{d_2-d_3} - d_3 \beta_{d_2-d_3} \quad (36)$$

$$\frac{d(f_1)}{dt} = f_2 \beta_{f_1-f_2} - f_1 \alpha_{f_1-f_2} \quad (37)$$

$$\frac{d(fca_1)}{dt} = fca_2 \beta_{fca_1-fca_2} - fca_1 \alpha_{fca_1-fca_2} \quad (38)$$

Where the transition rates for each variable couplet, ( $x = d_1-d_2, f_1-f_2, fca_1-fca_2$ ) are defined from the steady-state and time constant in the standard way:

$$\alpha_x = x_{ss} / \tau_x \quad (39)$$

$$\beta_x = (1 - x_{ss}) / \tau_x \quad (40)$$

And:

$$\alpha_{d_2-d_3} = k_{d_2d_3} \quad (41)$$

$$\beta_{d_2-d_3} = k_{d_3d_2} \quad (42)$$

$$d_{ss} = 1 / \left( 1 + e^{-(V_m - 5)/6.24} \right) \quad (43)$$

$$f_{ss} = 1 - 1 / \left( 1 + e^{(V_m + 32.06)/8.6} \right) \quad (44)$$

$$\tau_d = d_{ss} \cdot \left( 1 - e^{-(V_m - 5)/6.24} \right) / (0.035(V_m - 5)) \quad (45)$$

$$\tau_f = 2 / \left( 0.0197 e^{-([0.0337(V_m + 7)]^2 + 0.02)} \right) \quad (46)$$

$$fca_{ss} = 1 - 1 / \left( 1 + \left( [Ca^{2+}]_{ds} / \bar{Ca} \right)^m \right) \quad (47)$$

Note that the steady states of the inactivation gates ( $f$ ,  $fca$ ) are inverse to those in the standard Hodgkin-Huxley model because in this Markov description  $f_2$  is the inactivated state, equivalent to  $(1-f)$  in the standard description (and  $f_1$  is equivalent to  $f$ ).

**Table S3: RyR and LTCC flux parameters**

| Parameter     | Description                                                         | Value                                                   |
|---------------|---------------------------------------------------------------------|---------------------------------------------------------|
| $g_{RyR}$     | Maximal flux rate through the RyRs                                  | $2.05 \times 10^{-4} \mu\text{M}^3 \text{ms}^{-1}$      |
| $P_{Ca}$      | Maximum permeability of LTCC                                        | $11.9 \mu\text{mol C}^{-1} \text{ms}^{-1}$              |
| $\gamma_{Ca}$ | Activity Coefficient LTCC                                           | 0.341                                                   |
| $N_{RyR}$     | Number of RyRs per dyad*                                            | 100                                                     |
| $H$           | RyR Open rate $\text{Ca}^{2+}$ power                                | 2.5                                                     |
| $k_a$         | RyR activation rate constant                                        | $1.58 \times 10^{-4} \mu\text{M}^{-2.5} \text{ms}^{-1}$ |
| $k_b$         | RyR deactivation rate constant                                      | $1.0 \text{ms}^{-1}$                                    |
| $\tau_{M,1}$  | Time constant of monomer binding                                    | 25 ms                                                   |
| $\tau_{Mi,1}$ | Time constant of monomer inactivation                               | 30 ms                                                   |
| $\tau_{M,2}$  | Time constant monomer unbinding                                     | 156 ms                                                  |
| $\tau_{Mi,2}$ | Time constant of de-inactivation                                    | 75 ms                                                   |
| $N_{LTCC}$    | Number of L-type $\text{Ca}^{2+}$ channels per dyad*                | 15                                                      |
| $k_{d_2d_3}$  | Rate constant for transition $d_2-d_3$                              | $0.3 \text{ms}^{-1}$                                    |
| $k_{d_3d_2}$  | Rate constant for transition $d_3-d_2$                              | $6.0 \text{ms}^{-1}$                                    |
| $\tau_{fca}$  | Time constant for $\text{Ca}^{2+}$ induced inactivation             | 15 ms                                                   |
| $\bar{Ca}$    | $\text{Ca}^{2+}$ constant for $\text{Ca}^{2+}$ induced inactivation | $6.0 \mu\text{M}$                                       |
| $[Ca^{2+}]_o$ | Extracellular $\text{Ca}^{2+}$ concentration                        | 1.8 mM                                                  |



### Intracellular uptake and leak, $J_{up}$ and $J_{leak}$

These equations are based on Restrepo et al [3] and preceding studies [7,8].

$${}^m J_{up} = g_{up} \frac{\left( {}^m [Ca^{2+}]_i / K_{cyto} \right)^2 - \left( {}^m [Ca^{2+}]_{nSR} / K_{nSR} \right)^2}{1 + \left( {}^m [Ca^{2+}]_i / K_{cyto} \right)^2 + \left( {}^m [Ca^{2+}]_{nSR} / K_{nSR} \right)^2} \quad (48)$$

$${}^m J_{leak} = g_{leak} \frac{{}^m [Ca^{2+}]_{nSR}^2}{{}^m [Ca^{2+}]_{nSR}^2 + K_{leak}^2} \left( {}^m [Ca^{2+}]_{nSR} - {}^m [Ca^{2+}]_i \right) \quad (49)$$

**Table S4:  $Ca^{2+}$  uptake and leak parameters**

| Parameter  | Description                      | Value                                  |
|------------|----------------------------------|----------------------------------------|
| $g_{up}$   | Maximal flux rate of $J_{up}$    | 0.339 $\mu\text{M}\cdot\text{ms}^{-1}$ |
| $K_{cyto}$ | Cytoplasm constant for $J_{up}$  | 0.15 $\mu\text{M}$                     |
| $K_{nSR}$  | Network SR constant for $J_{up}$ | 1700 $\mu\text{M}$                     |
| $g_{leak}$ | Maximal flux rate of $J_{leak}$  | 1.412 $\times 10^{-5} \text{ ms}^{-1}$ |
| $K_{leak}$ | $J_{leak}$ constant              | 450 $\mu\text{M}$                      |

### Membrane fluxes, $J_{NaCa}$ , $J_{pCa}$ and $J_{CaB}$

$${}^m J_{NaCa} = \frac{K_a g_{NaCa} v_{vox}^{-1} \left( e^{\eta z} [Na^+]_i [Ca^{2+}]_o - e^{(\eta-1)z} [Na^+]_o {}^m [Ca^{2+}]_{cyto} \right)}{(t_1 + t_2 + t_3) (1 + K_{sat} e^{(\eta-1)z})} \quad (50)$$

$${}^m J_{pCa} = \left( v_i^{-1} g_{pCa} {}^m [Ca^{2+}]_i \right) / \left( K_{mpCa} + {}^m [Ca^{2+}]_i \right) \quad (51)$$

$${}^m J_{CaB} = v_{vox}^{-1} g_{CaB} (V_m - E_{r,Ca}) \quad (52)$$

Where

$$t_1 = K_{mCai} [Na^+]_o^3 \left( 1 + \left( [Na^+]_i / K_{mNai} \right)^3 \right) \quad (53)$$

$$t_2 = K_{mNao}^3 {}^m [Ca^{2+}]_i \left( 1 + \left( {}^m [Ca^{2+}]_i / K_{mCai} \right) \right) \quad (54)$$

$$t_3 = K_{mCao} [Na^+]_i^3 + [Na^+]_i^3 [Ca^{2+}]_o + [Na^+]_o^3 {}^m [Ca^{2+}]_i \quad (55)$$

$$K_a = \left[ 1 + \left( K_{da} / {}^m [Ca^{2+}]_i \right) \right] \quad (56)$$

$$z = \frac{V_m F}{RT} \quad (57)$$

**Table S5: Membrane flux parameters**

| Parameter  | Description                                              | Value                                                                                           |
|------------|----------------------------------------------------------|-------------------------------------------------------------------------------------------------|
| $g_{NaCa}$ | Maximal flux rate of Sodium-Ca <sup>2+</sup> exchanger   | 0.3726 $\mu\text{m}^3 \cdot \mu\text{M} \cdot \text{ms}^{-1}$                                   |
| $K_{da}$   | Ca <sup>2+</sup> scaling constant                        | 0.11 $\mu\text{M}$                                                                              |
| $\eta$     | Voltage sensitivity coefficient                          | 0.35                                                                                            |
| $K_{sat}$  | Saturation constant                                      | 0.27                                                                                            |
| $K_{mcai}$ | Intracellular Ca <sup>2+</sup> constant                  | 3.59 $\mu\text{M}$                                                                              |
| $K_{mcao}$ | Extracellular Ca <sup>2+</sup> constant                  | 1.3 mM                                                                                          |
| $K_{mnai}$ | Intracellular Na <sup>+</sup> constant                   | 12.3 mM                                                                                         |
| $K_{mnao}$ | Extracellular Na <sup>+</sup> constant                   | 87.5 mM                                                                                         |
| $g_{pca}$  | Maximal flux rate of PMCA Ca <sup>2+</sup> pump          | $1.37 \times 10^{-3} \mu\text{m}^3 \cdot \mu\text{M} \cdot \text{ms}^{-1}$                      |
| $g_{cab}$  | Maximal flux rate of background Ca <sup>2+</sup> current | $1.82 \times 10^{-5} \mu\text{m}^3 \cdot \mu\text{M} \cdot \text{ms}^{-1} \cdot \text{mV}^{-1}$ |
| $[Na^+]_i$ | Intracellular Na <sup>+</sup> concentration              | 7.95 mM                                                                                         |
| $[Na^+]_o$ | Extracellular Na <sup>+</sup> concentration              | 136 mM                                                                                          |

## Ca<sup>2+</sup> Buffering

### Instantaneous buffering in the cytoplasm

Instantaneous buffering in the cytoplasm follows that of previous models, e.g., Restrepo et al [3] and Nivala et al. [9], based on [10]. At each voxel,  $n$ , the buffering term is given by:

$${}^m\beta_{cyto} = \left[ 1 + \sum_x \frac{B_x K_x}{\left( {}^m[Ca^{2+}]_{cyto} + K_x \right)^2} \right]^{-1} \quad (58)$$

Where  $x$  refers to four buffering processes: Calmodulin, SR sites, Myosin (Ca) and Myosin (Mg).

### Instantaneous buffering in the jSR

Buffering in the jSR follows that of the previous study Gaur-Rudy [4]:

$${}^m\beta_{jSR} = \left[ 1 + \frac{B_{csqn} K_{mcsqn}}{\left( {}^m[Ca^{2+}]_{jSR} + K_{mcsqn} \right)^2} \right]^{-1} \quad (59)$$

**Table S4: Ca<sup>2+</sup> buffering parameters**

| Parameter   | Description                           | Value               |
|-------------|---------------------------------------|---------------------|
| $K_{CAM}$   | Dissociation constant for calmodulin  | 7.0 $\mu\text{M}$   |
| $B_{CAM}$   | Total concentration buffering sites   | 24.0 $\mu\text{M}$  |
| $K_{SR}$    | Dissociation constant for SR sites    | 0.6 $\mu\text{M}$   |
| $B_{SR}$    | Total concentration buffering sites   | 47.0 $\mu\text{M}$  |
| $K_{M,Ca}$  | Dissociation constant for Myosin (Ca) | 0.033 $\mu\text{M}$ |
| $B_{M,Ca}$  | Total concentration buffering sites   | 140.0 $\mu\text{M}$ |
| $K_{M,Mg}$  | Dissociation constant for Myosin (Mg) | 3.64 $\mu\text{M}$  |
| $B_{M,Mg}$  | Total concentration buffering sites   | 140 $\mu\text{M}$   |
| $K_{mcsqn}$ | Dissociation constant for csqn        | 0.8 mM              |
| $B_{csqn}$  | Total concentration buffering sites   | 10 mM               |

## References

1. Colman MA, Pinali C, Trafford AW, Zhang H, Kitmitto A. A computational model of spatio-temporal cardiac intracellular calcium handling with realistic structure and spatial flux distribution from sarcoplasmic reticulum and t-tubule reconstructions. *PLOS Comput Biol.* 2017 Aug 31;13(8):e1005714.
2. Stern MD, Song LS, Cheng H, Sham JS, Yang HT, Boheler KR, et al. Local control models of cardiac excitation-contraction coupling. A possible role for allosteric interactions between ryanodine receptors. *J Gen Physiol.* 1999 Mar;113(3):469–89.
3. Restrepo JG, Weiss JN, Karma A. Calsequestrin-mediated mechanism for cellular calcium transient alternans. *Biophys J.* 2008 Oct;95(8):3767–89.
4. Gaur N, Rudy Y. Multiscale modeling of calcium cycling in cardiac ventricular myocyte: macroscopic consequences of microscopic dyadic function. *Biophys J.* 2011 Jun 22;100(12):2904–12.
5. Luo CH, Rudy Y. A dynamic model of the cardiac ventricular action potential. I. Simulations of ionic currents and concentration changes. *Circ Res.* 1994 Jun;74(6):1071–96.
6. Song Z, Ko CY, Nivala M, Weiss JN, Qu Z. Calcium-voltage coupling in the genesis of early and delayed afterdepolarizations in cardiac myocytes. *Biophys J.* 2015 Apr 21;108(8):1908–21.
7. Shiferaw Y, Watanabe MA, Garfinkel A, Weiss JN, Karma A. Model of intracellular calcium cycling in ventricular myocytes. *Biophys J.* 2003 Dec;85(6):3666–86.
8. Shannon TR, Wang F, Puglisi J, Weber C, Bers DM. A mathematical treatment of integrated Ca dynamics within the ventricular myocyte. *Biophys J.* 2004 Nov;87(5):3351–71.
9. Nivala M, de Lange E, Rovetti R, Qu Z. Computational modeling and numerical methods for spatiotemporal calcium cycling in ventricular myocytes. *Front Physiol.* 2012;3:114.
10. Wagner J, Keizer J. Effects of rapid buffers on Ca<sup>2+</sup> diffusion and Ca<sup>2+</sup> oscillations. *Biophys J.* 1994 Jul;67(1):447–56.
